# Supplementary material for: Amphiphilic polymer coated nanodiamonds: a promising platform to deliver azonafide
Source: Royal Society of Chemistry journal article supplement (doi:10.1039/c9py00055k), 2019-01-01
Supplement: c9py00055k1.pdf [file c9py00055k1.pdf]

## Supporting Information

### Amphiphilic Polymer Coated Nanodiamonds: A Promising Platform to Deliver Azonafide

H. Lai,<sup>a</sup> M. Lu,<sup>a</sup> F. Chen,<sup>a</sup> J. Lalevée,<sup>b,c</sup> M. H. Stenzel<sup>a</sup> and P. Xiao<sup>\*,a,d</sup>

<sup>a</sup> Centre for Advanced Macromolecular Design, School of Chemistry, University of New South Wales, Sydney, NSW 2052, Australia

<sup>b</sup> Université de Haute-Alsace, CNRS, IS2M UMR 7361, F-68100 Mulhouse, France

<sup>c</sup> Université de Strasbourg, France

<sup>d</sup> Research School of Chemistry, Australian National University, Canberra, ACT 2601, Australia

Corresponding Authors: [pu.xiao@anu.edu.au](mailto:pu.xiao@anu.edu.au)

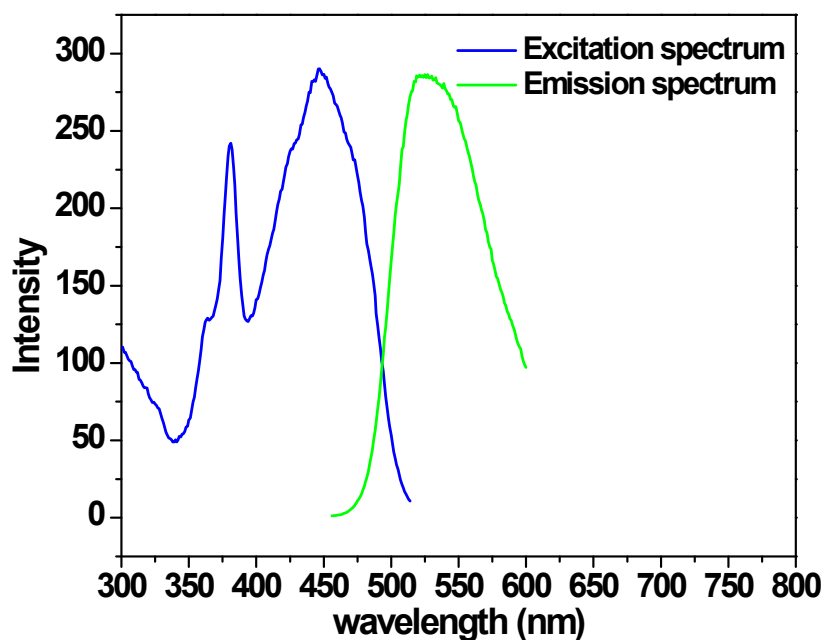

Figure S1. Excitation and emission spectra of azonafide in water.

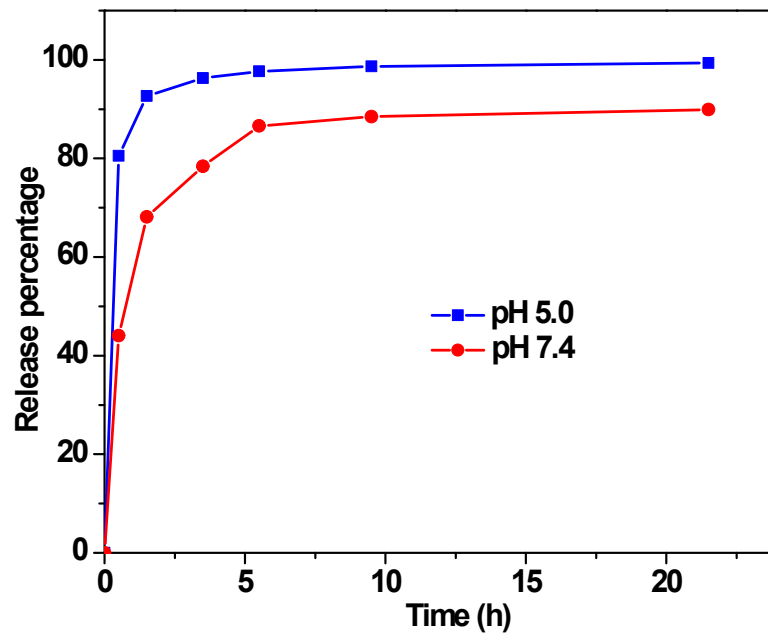

**Figure S2.** Cumulative release of ND@polymer+Azonafide nanoparticles in buffer solution with pH 5.0 and 7.4 with concentration of 2 mg mL<sup>-1</sup>.
